# Supplementary material
Source: Springer Nature journal article supplement (https://www.springermedizin.de/resource/supplementary/12935_2011_317_MOESM3_ESM.pdf/9540298)

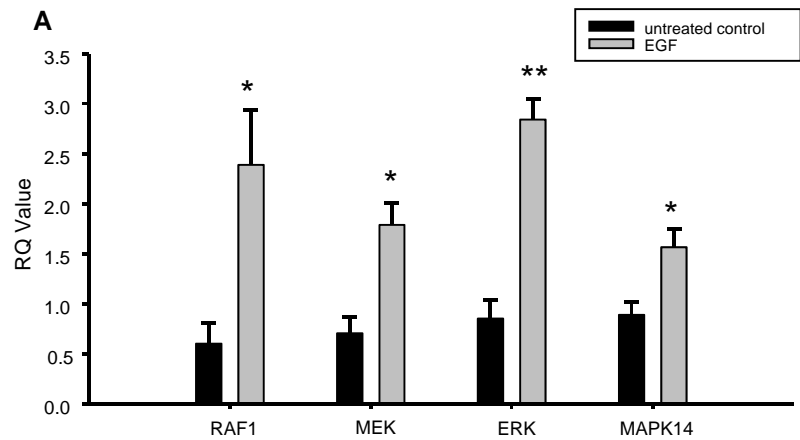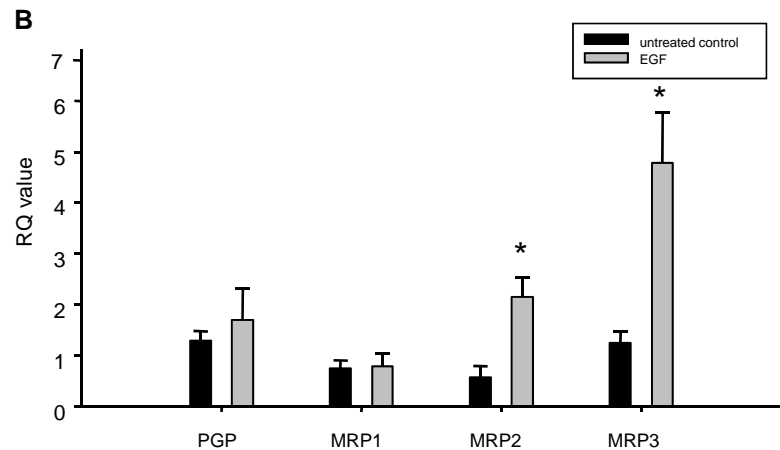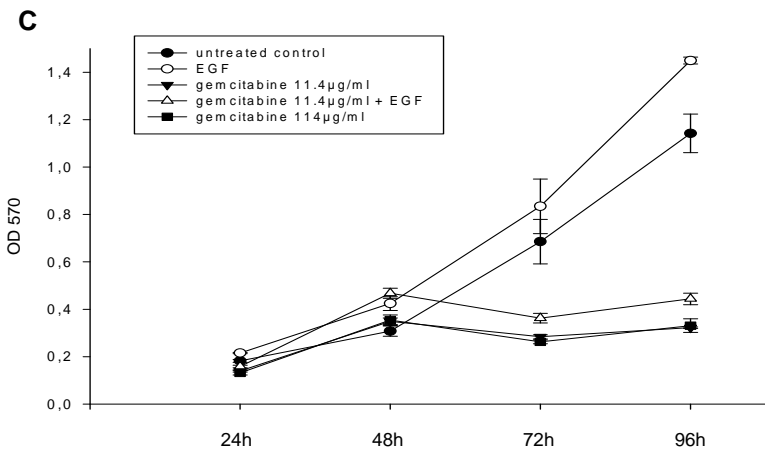

Supplement: MOESM3 [file 9540298]
